# Supplementary material
Source: Frontiers journal article supplement (https://www.frontiersin.org/articles/539170)
Supplement: Image_1.pdf [file Image_1.pdf]

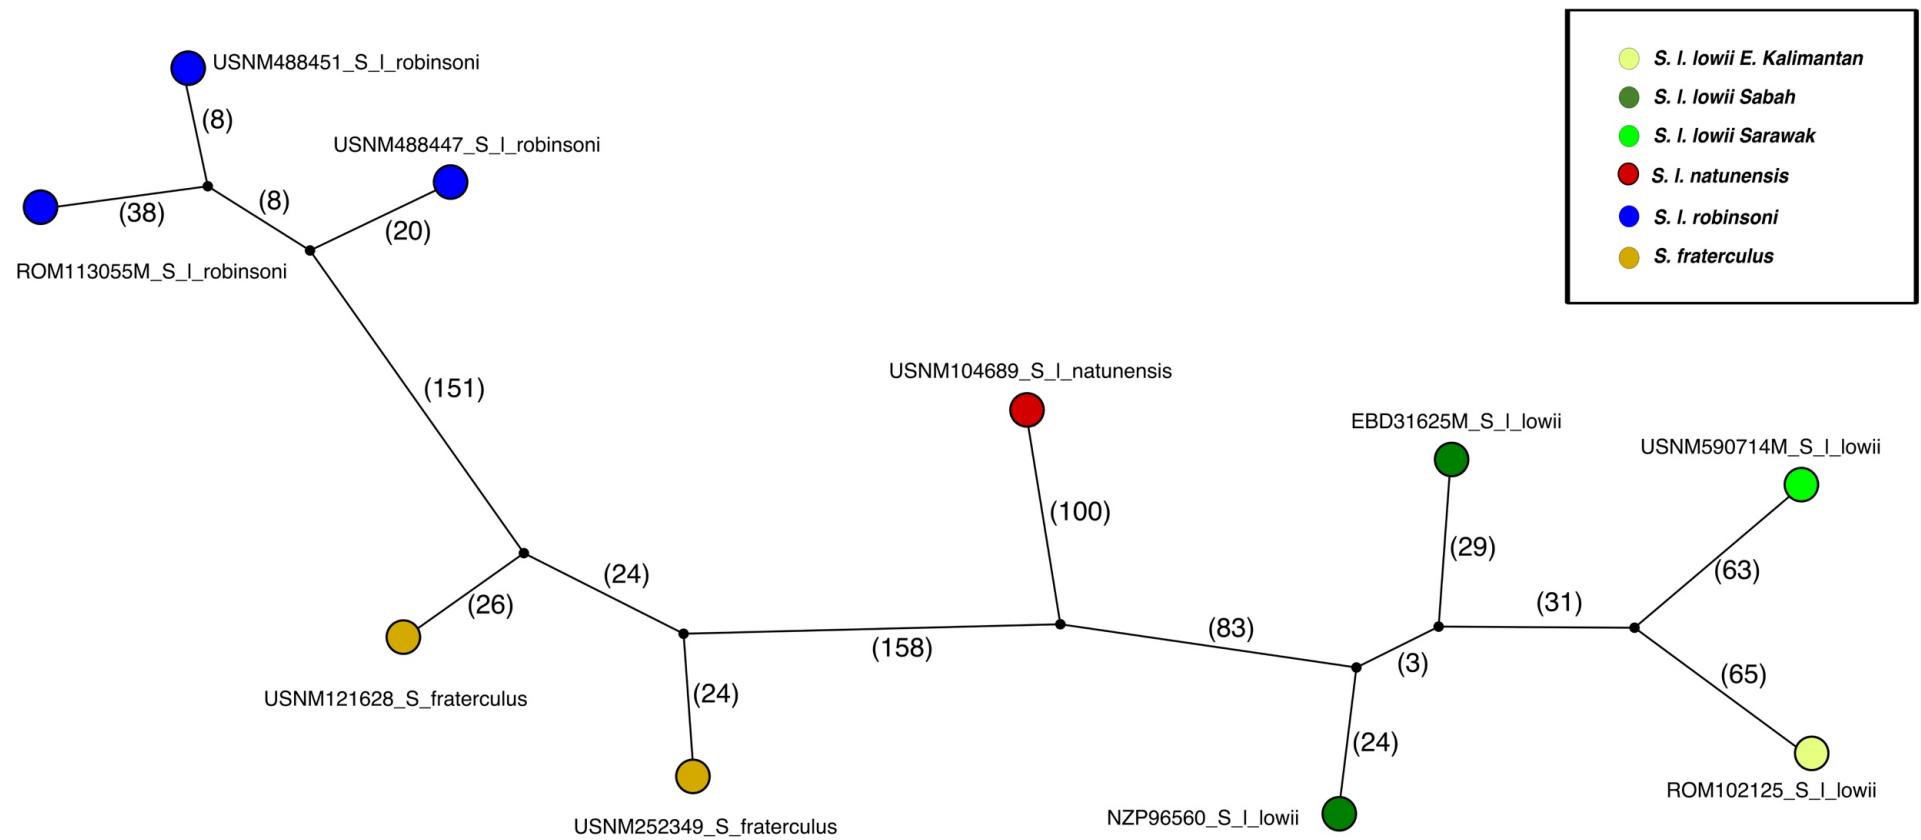

**Supplementary figure 1.** TCS haplotype network for mitochondrial genomes. Number of base pair differences among haplotypes are shown in parentheses; black dots represent missing haplotypes.
